# Supplementary material for: Biological Stoichiometry in Tumor Micro-environments
Source: PubMed Central journal article supplement (PMC3551943; doi:10.1371/journal.pone.0051844), 2013-01-22
Supplement: pone.0051844.s001.pdf [file pone.0051844.s001.pdf]

## Appendix S1

### S1.1 The equation for the rate of change of the concentration of extracellular phosphorus.

Let  $P_{ex}(t)$  be the concentration of phosphorus in the tumor interstitium and therefore available for cells to absorb. We assume that interstitial volume is a constant proportion of total tumor volume and scale our measure of concentration such that  $P_{ex}^{tot}(t) = P_{ex}(t)N(t)$  is the absolute amount of interstitial P (recall that  $N(t) = \int_0^1 x_\alpha(t)d\alpha$  is the total volume occupied by all the tumor cell clones  $x_\alpha(t)$ , where  $\alpha$  accounts for the proportion of slowly proliferating (s-clones) in the total tumor).

Arterial P delivery occurs at rate  $g_2(P_0 - P_{ex}(t))$ , where  $P_0$  is the P concentration in arterial blood, and  $g_2$  is the capillary permeability constant. The term is chosen based on standard chemostat models. Interstitial phosphorus is absorbed by cells and is converted to intracellular phosphorus at rate  $m(P_{ex}(t) - P_{in}(t))\frac{N(t)}{k_2 + P_{ex}(t) - P_{in}(t)}$ , where  $P_{in}(t)$  is the intracellular P concentration. The term  $m := m_p(1 - E^t[\alpha]) + m_s E^t[\alpha]$ , where  $E^t[\alpha]$  is the mean value of the partition strategy  $\alpha$  in the cell population (see main text for derivation), measures the per capita uptake rate of P throughout the tumor. Phosphorus is also released from cells that die. Therefore, the rate of change of the absolute amount of interstitial P is described by the following equation:

$$\frac{dP_{ex}^{tot}(t)}{dt} = \frac{dP_{ex}(t)}{dt}N(t) + P_{ex}(t)\frac{dN(t)}{dt} \quad (1)$$

$$= g_2N(t)(P_0 - P_{ex}(t)) - mN(t)\frac{P_{ex}(t) - P_{in}(t)}{k_2 + P_{ex}(t) - P_{in}(t)} + dN(t)P_{in}(t) \quad (2)$$

and the dynamics of  $P_{ex}$  is then governed by:

$$\frac{dP_{ex}}{dt} = g_2(P_0 - P_{ex}(t)) - m\frac{P_{ex}(t) - P_{in}(t)}{k_2 + P_{ex}(t) - P_{in}(t)} + dP_{in}(t) - P_{ex}(t)E^t[F], \quad (3)$$

where

$$E^t[F] := \frac{N'(t)}{N(t)} = E^t[\alpha]r_s \left(1 - \frac{N(t)}{z(t)}\right) + (1 - E^t[\alpha])r_p \left(\frac{z(t)}{N(t) + \xi z(t)^2} - d\right), \quad (4)$$

and  $z(t) = h\frac{C_{in}P_{in}(t)}{C_{in} + P_{in}(t)}$  (see main text for the derivation of both  $E^t[F]$  and  $z(t)$ ).

## S1.2 The equation for rate of change of concentration of intracellular phosphorus.

The total amount of intracellular phosphorus among all cells of type  $\alpha$  is  $P_{in}^{tot}(t) = P_{in}(t)N(t)$ , where  $P_{in}(t)$  is the concentration of phosphorus per cell volume. As follows from the previous equation, interstitial phosphorus is absorbed by cells and is converted to intracellular phosphorus at a rate  $m(P_{ex}(t) - P_{in}(t))\frac{N(t)}{k_2 + P_{ex}(t) - P_{in}(t)}$ . Noticeably, intracellular phosphorus  $P_{in}(t)$  is not consumed irreversibly as fuel but is used for biosynthesis, particularly of ribosomes. Therefore, the rate of change of the absolute amount of intracellular P is described by the following equation:

$$\frac{dP_{in}^{tot}}{dt} = mN(t)\frac{P_{ex}(t) - P_{in}(t)}{k_2 + (P_{ex}(t) - P_{in}(t))} \quad (5)$$

Since

$$\frac{dP_{in}^{tot}(t)}{dt} = \frac{dP_{in}(t)N(t)}{dt} = \frac{dP_{in}(t)}{dt}N(t) + P_{in}(t)\frac{dN(t)}{dt}, \quad (6)$$

the dynamics of  $P_{in}(t)$  is given by

$$\frac{dP_{in}}{dt} = m\frac{P_{ex}(t) - P_{in}(t)}{k_2 + (P_{ex}(t) - P_{in}(t))} - P_{in}(t)E^t[F], \quad (7)$$

where  $E^t[F]$  is defined above.
